# Supplementary material
Source: publisher figshare collection journal article supplement (https://springernature.figshare.com/ndownloader/files/24127490)

**Additional File 1: Representative electropherograms of the *Bacillus anthracis* 16S rDNA gene sequences.**

The electropherogram of 16S rDNA reverse complement read of *B. anthracis* DFR.BHE 3 strain. Arrows indicate (a) single peak corresponding to position 1148 indicating A (T in reverse read here) (b) dual peak at position 1139 indicating mixed base pair G/A [C/T]in reverse read here] described by Hakovirta et al. 2016 [6].

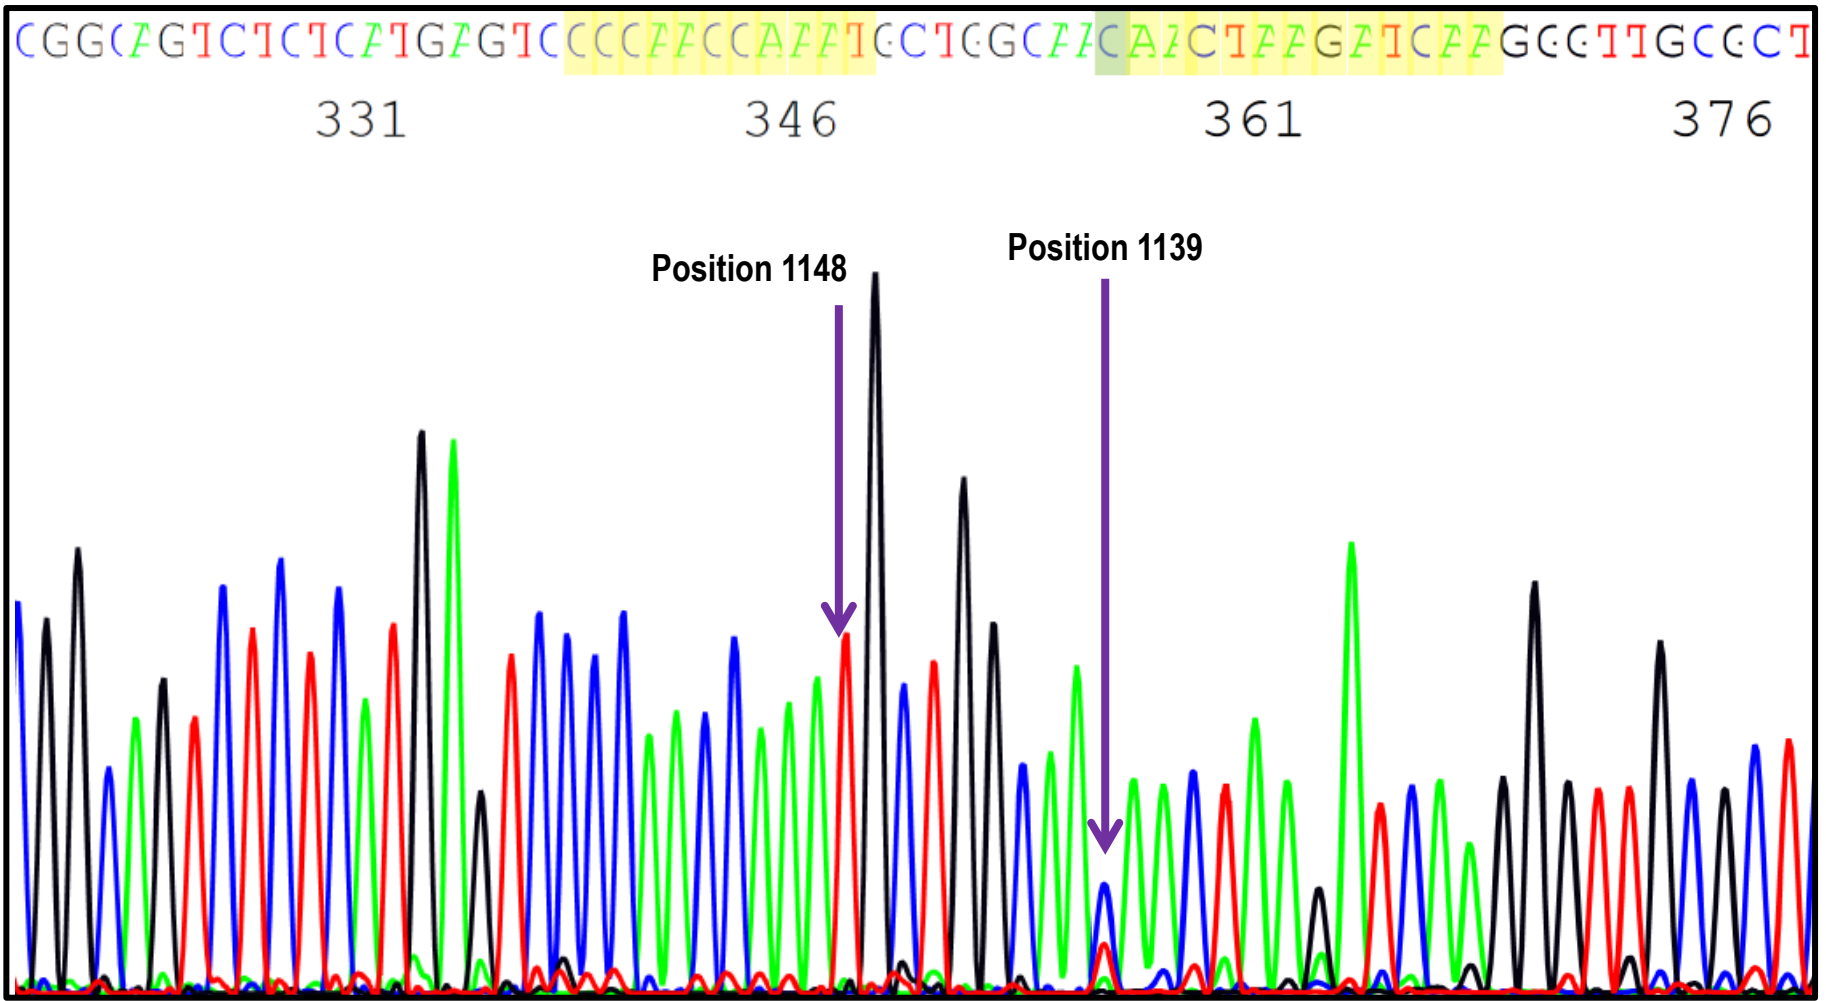

Supplement: Supplementary file [file 24127490]
